# Supplementary material
Source: Research Square preprint supplement (doi:10.21203/rs.3.rs-9798281/v1)
Supplement: Supplementary file 1 [file d80885afb283977228408eb7.docx]

| **Table 1**  **The retention time and massspectrometric data in the peels of** *D. cirrhosa* | | | | | | | | |
| --- | --- | --- | --- | --- | --- | --- | --- | --- |
| Peak | tR | Theoretical Mass *m/z* | Experimental Mass *m/z* | Error (ppm) | Formula | MS/MS fragment  (-) | MS/MS fragment  (+) | Identification |
| 1. * | 0.94 | 191.05611 | 191.05545 | -3.46 | C7H12O6 | MS2[191]:85.0280(100), 93.0331(27), 109.0281(6), 127.0387(4) |  | Quinic acid |
| 1. * | 0.98 | 191.01972 | 191.01910 | -3.28 | C6H8O7 | MS2[191]:85.0280(100), 111.0073(47), |  | Citric Acid |
|  | 1.13 | 191.01972 | 191.01907 | -3.43 | C6H8O7 | MS2[191]:87.0073(100), 111.0073(68), |  | Citric Acid isomer |
|  | 1.19 | 187.02481 | 187.02422 | -3.16 | C7H8O6 | MS2[187]:128.0342(100), 125.0233(94), 102.0548(67), 144.0656(37), 143.0340(11) |  | Gallic acid hydrate |
|  | 1.34 | 331.06706 | 331.06747 | 1.21 | C13H16O10 | MS2[331]:331.0672(100), 169.0134(63), 151.0027(37), 125.0233(35), 193.0136(14), |  | Galloylglucose |

| **Table1** (continued) | | | | | | | | |
| --- | --- | --- | --- | --- | --- | --- | --- | --- |
| Peak | tR | Theoretical Mass *m/z* | Experimental Mass *m/z* | Error (ppm) | Formula | MS/MS fragment  (-) | MS/MS fragment  (+) | Identification |
|  | 1.38 | 493.11989 | 493.12012 | 0.46 | C19H26O15 | MS2[493]:331.0673(100), 169.0135(98), 125.0234(50) |  | Galloylsucrose |
| 1. * | 1.55 | 169.01424 | 169.01355 | -4.12 | C7H6O5 | MS2[169]:125.0233(100) |  | Gallic acid |
|  | 1.59 | 331.06706 | 331.06757 | 1.51 | C13H16O10 | MS2[331]:125.0233(100), 151.0027(82), 169.0135(69), 153.0183(16), 109.0283(10) |  | Galloylglucose |
|  | 1.90 | 865.19853 | 865.19965 | 1.29 | C45H38O18 | MS2[865]:125.0233(100), 289.0720(41), 407.0774(25), 161.0236(24), 245.0456(10) |  | Procyanidin C1 |
|  | 1.95 | 345.08271 | 345.08292 | 0.58 | C14H18O10 | MS2[345]:183.0292(100), 139.0391(2), 225.0400(1) |  | methyl galloylglucose  isomer |
|  | 2.15 | 167.03498 | 167.03423 | -4.50 | C8H8O4 | MS2[167]:167.0341(100), 123.0440(63), 108.0207(1) |  | Vanillic acid isomer |

| **Table1** (continued) | | | | | | | | |
| --- | --- | --- | --- | --- | --- | --- | --- | --- |
| Peak | tR | Theoretical Mass *m/z* | Experimental Mass *m/z* | Error (ppm) | Formula | MS/MS fragment  (-) | MS/MS fragment  (+) | Identification |
|  | 2.19 | 331.06706 | 331.06708 | 0.03 | C13H16O10 | MS2[331]:169.0135(100), 125.0233(9) |  | Galloylglucose |
|  | 2.46 | 345.08271 | 345.08347 | 2.17 | C14H18O10 | MS2[345]:345.0828(100), 183.0293(42), 139.0390(44), 225.0402(6) |  | methyl galloylglucose  isomer |
|  | 2.47 | 849.20362 | 849.20490 | 1.50 | C45H38O17 | MS2[849]:125.0233(100), 289.0720(50), 407.0774(25), 161.0235(19), 271.0615(11), 425.0896(1) |  | Epiafzelechin-epicatechin-epicatechin |
|  | 2.52 | 153.01933 | 153.01839 | -6.16 | C7H6O4 | MS2[153]:109.0283(100), 153.0184(37) |  | Protocatechuic acid |
|  | 2.52 | 315.10854 | 315.10880 | 0.82 | C14H20O8 | MS2[315]:153.0548(100), 123.0441(12) |  | 3,4-Dihydroxyphenylethyl alcohol  Glucoside |
| **Table1** (continued) | | | | | | | | |
| Peak | tR | Theoretical Mass *m/z* | Experimental Mass *m/z* | Error (ppm) | Formula | MS/MS fragment  (-) | MS/MS fragment  (+) | Identification |
|  | 2.52 | 329.08780 | 329.08801 | 0.62 | C14H18O9 | MS2[329]:108.0203(100), 152.0103(91), 167.0338(63), 123.0438(62)，153.0136(1) |  | vanillic acid-O-glucoside |
| 1. * | 3.05 | 353.08780 | 353.08759 | -0.61 | C16H18O9 | MS2[353]:175.0268(100), 153.0547(87), 191.0554(71), 135.0441(57), 179.0343(39) |  | 3-CQA  Neochlorogenic acid |
|  | 3.14 | 329.08780 | 329.08820 | 1.20 | C14H18O9 | MS2[329]:123.0438(100), 167.0339(28), 149.0232(14), 101.0229(13), 152.0103(10) |  | vanillic acid-O-glucoside |
|  | 3.16 | 197.04554 | 197.04492 | -3.18 | C9H10O5 | MS2[197]:182.0214(100), 197.0450(25), 166.9977(15), 153.0184(11) |  | Syringic acid isomer |
| 1. * | 3.38 | 137.02441 | 137.02339 | -7.50 | C7H6O3 | MS2[137]:137.0234(100), |  | Salicylic acid |
| **Table1** (continued) | | | | | | | | |
| Peak | tR | Theoretical Mass *m/z* | Experimental Mass *m/z* | Error (ppm) | Formula | MS/MS fragment  (-) | MS/MS fragment  (+) | Identification |
|  | 3.42 | 465.10384 | 465.10385 | 0.00 | C21H22O12 | MS2[465]:285.0406(100), 275.0563(75), 125.0233(51), 303.0512(35), 151.0027(8) |  | Taxifolin-hexoside |
| 1. * | 3.60 | 145.05063 | 145.04979 | -5.81 | C6H10O4 | MS2[145]:101.0569(100), 145.0497(53) |  | 2,2-Dimethylsuccinic acid |
|  | 3.60 | 451.12458 | 451.12500 | 0.92 | C21H24O11 | MS2[451]:289.0719(100), 245.0818(23) |  | Catechin-glucopyranoside |
|  | 3.72 | 341.08780 | 341.08826 | 1.33 | C15H18O9 | MS2[341]:135.0441(100), 153.0184(81), 179.0341(74), |  | Caffeic acid-hexoside |
|  | 3.80 | 609.12497 | 609.12500 | 0.04 | C30H26O14 | MS2[609]:125.0232(100), 177.0185(36), 423.0723(3) 305.0667(1), |  | Prodelphinidin B-type |

| **Table1** (continued) | | | | | | | | |
| --- | --- | --- | --- | --- | --- | --- | --- | --- |
| Peak | tR | Theoretical Mass *m/z* | Experimental Mass *m/z* | Error (ppm) | Formula | MS/MS fragment  (-) | MS/MS fragment  (+) | Identification |
|  | 3.85 | 739.18797 | 739.18933 | 1.84 | C36H36O17 | MS2[739]:125.0233(100), 289.0720(87), 407.0774(71)， 161.0236(31), 245.0817(11), |  | procyanidin B1-O-β-D-glucopyranoside |
| 1. * | 3.87 | 183.02989 | 183.02934 | -3.04 | C8H8O5 | MS2[183]:183.0293(100), 168.0058(10),124.0155(5), 151.0032(1) |  | Methyl gallate |
| 1. * | 3.90 | 577.13514 | 577.13562 | 0.82 | C30H26O12 | MS2[577]:289.0719(100), 125.0233(78), 407.0774(63), 245.0816(11) |  | Procyanidin B1 |
|  | 4.00 | 457.07763 | 457.07922 | 3.47 | C22H18O11 | MS2[457]:169.0134(100), 101.0232(21), 119.0338(17), 113.0232(10) |  | (-)-Gallocatechin gallate） |
|  | 4.03 | 177.01933 | 177.01866 | -3.80 | C9H6O4 | MS2[177]:133.0282(100), 132.0204(67), 105.0205(28), 118.9649(19) |  | Esculetin |
|  | 4.04 | 305.06667 | 305.06686 | 0.60 | C15H14O7 | MS2[305]:125.0233(100), 179.0343(19), 167.0341(18), 137.0234(18) |  | (-)-gallocatechin |
| **Table1** (continued) | | | | | | | | |
| Peak | tR | Theoretical Mass *m/z* | Experimental Mass *m/z* | Error (ppm) | Formula | MS/MS fragment  (-) | MS/MS fragment  (+) | Identification |
|  | 4.08 | 577.13514 | 577.13574 | 1.02 | C30H26O12 | MS2[577]:289.0719(100), 125.0233(76), 407.0773(66), 245.0818(15) |  | Procyanidin B-type |
|  | 4.19 | 609.12497 | 609.12616 | 1.94 | C30H26O14 | MS2[609]:125.0233(100), 177.0186(33), 423.0729(3), 305.0660(1) |  | Prodelphinidin B-type |
|  | 4.22 | 465.10384 | 465.10403 | 0.39 | C21H22O12 | MS2[465]:285.0406(100), 125.0233(50), 275.0564(30), 303.0512(23), 151.0027(9) |  | Taxifolin-hexoside |
|  | 4.25 | 329.08780 | 329.08792 | 0.35 | C14H18O9 | MS2[329]:167.0338(100), 123.0438(44), 125.0230(10) |  | vanillic acid-O-glucoside |
| 1. * | 4.27 | 289.07176 | 289.07202 | 0.90 | C15H14O6 | MS2[289]:289.0720(100), 245.0819(98), 203.0708(44), 205.0502(39), 187.0396(10) |  | Catechin |

| **Table1** (continued) | | | | | | | | |
| --- | --- | --- | --- | --- | --- | --- | --- | --- |
| Peak | tR | Theoretical Mass *m/z* | Experimental Mass *m/z* | Error (ppm) | Formula | MS/MS fragment  (-) | MS/MS fragment  (+) | Identification |
|  | 4.28 | 457.07763 | 457.07867 | 2.27 | C22H18O11 | MS2[457]:169.0136(100), 166.9979(29), 125.0234(18), 249.0770(15), 139.0028(11), 151.0029(8) |  | Epigallocatechin gallate(EGCG) |
|  | 4.30 | 739.18797 | 739.19006 | 2.82 | C36H36O17 | MS2[739]:407.0775(100), 125.0233(69), 289.0721(63), 161.0236(20), 245.0819(6) |  | procyanidin B2-O-β-D-glucopyranoside |
|  | 4.40 | 341.08780 | 341.08823 | 1.25 | C15H18O9 | MS2[341]:135.0441(100), 179.0342(77), 153.0184(51), |  | Caffeic acid-hexoside |
|  | 4.46 | 305.06667 | 305.06693 | 0.83 | C15H14O7 | MS2[305]:125.0233(100), 137.0234(10), 167.0342(5), 179.0344(2) |  | (-)-epigallocatechin |

| **Table1** (continued) | | | | | | | | |
| --- | --- | --- | --- | --- | --- | --- | --- | --- |
| Peak | tR | Theoretical Mass *m/z* | Experimental Mass *m/z* | Error (ppm) | Formula | MS/MS fragment  (-) | MS/MS fragment  (+) | Identification |
|  | 4.50 | 355.10345 | 355.10391 | 1.28 | C16H20O9 | MS2[355]:134.0360(100), 149.0595(35), 178.0260(28), 193.0495(24) |  | Ferulic acid-O-glucoside[isomer](file:///E:/QSH12345678/%25E6%2596%25B0%25E5%25BB%25BA%25E6%2596%2587%25E4%25BB%25B6%25E5%25A4%25B9/Application/8.9.6.0/resultui/html/index.html" \l "/javascript:;) |
|  | 4.55 | 865.19853 | 865.19995 | 1.63 | C45H38O18 | MS2[865]:125.0233(100), 289.0720(42), 161.0236(27), 407.0776(25), 245.0455(13) |  | (epi)catechin-(epi)catechin-(epi)catechin |
|  | 4.63 | 305.06667 | 305.06696 | 1.38 | C15H14O7 | MS2[305]:125.0233(100), 137.0234(10), 167.0341(6), 179.0341(3) |  | (epi)gallocatechin |
|  | 4.66 | 739.18797 | 739.19086 | 3.91 | C36H36O17 | MS2[739]:167.0341(100), 289.0719(50), 125.0233(37), 161.0235(19), 245.0817(10) |  | procyanidin B2-O-β-D-glucopyranoside |
|  | 4.68 | 451.12458 | 451.12485 | 0.59 | C21H24O11 | MS2[451]:289.0719(100), 245.0817(23) |  | Epicatechin-glucopyranoside |

| **Table1** (continued) | | | | | | | | |
| --- | --- | --- | --- | --- | --- | --- | --- | --- |
| Peak | tR | Theoretical Mass *m/z* | Experimental Mass *m/z* | Error (ppm) | Formula | MS/MS fragment  (-) | MS/MS fragment  (+) | Identification |
|  | 4.72 | 457.07763 | 457.07791 | 0.60 | C22H18O11 | MS2[457]:169.0136(100), 125.0235(16), 166.9979(13) |  | Epigallocatechin gallate(EGCG) |
| 1. * | 4.74 | 353.08780 | 353.08807 | 0.75 | C16H18O9 | MS2[353]:191.0554(100), 135.0440(1), 173.0448(3), 179.0342(3), 161.0236(1) |  | Trans-5-CQA  Chlorogenic acid |
|  | 4.74 | 355.10345 | 355.10437 | 2.58 | C16H20O9 | MS2[355]:235.0605(100), 191.0551(61), 192.0584(52), 265.0713(22), 207.0653(20), 193.0495(10) |  | Ferulic acid-O-glucoside[isomer](file:///E:/QSH12345678/%25E6%2596%25B0%25E5%25BB%25BA%25E6%2596%2587%25E4%25BB%25B6%25E5%25A4%25B9/Application/8.9.6.0/resultui/html/index.html" \l "/javascript:;) |
|  | 4.76 | 475.14571 | 475.14642 | 1.49 | C20H28O13 | MS2[475]:169.0494(100), 125.0230(61), 167.0339(40), 101.0230(27), 151.0388(16), 153.0180(15), |  | Vanillic acid-O-rutinoside |
|  | 4.87 | 577.13514 | 577.13580 | 1.13 | C30H26O12 | MS2[577]:289.0719(100), 125.0233(78), 407.0774(60), 245.0818(14) |  | Procyanidin B-type |
| **Table1** (continued) | | | | | | | | |
| Peak | tR | Theoretical Mass *m/z* | Experimental Mass *m/z* | Error (ppm) | Formula | MS/MS fragment  (-) | MS/MS fragment  (+) | Identification |
|  | 4.90 | 865.19853 | 865.19965 | 1.29 | C45H38O18 | MS2[865]:125.0233(100), 289.0720(39), 161.0236(24), 407.0774(21), 245.0454(9) |  | (epi)catechin-(epi)catechin-(epi)catechin |
|  | 4.98 | 561.14023 | 561.14148 | 2.22 | C30H26O11 | MS2[561]:289.0719(100), 245.0818(33), 125.0233(25), 407.0775(8), 271.0614(6), |  | epiafzelechin-epicatechin |
| 1. * | 5.00 | 179.03498 | 179.03423 | -4.20 | C9H8O4 | MS2[179]:135.0441(100), 179.0342(36) |  | Caffeic acid |
|  | 5.09 | 597.18249 | 597.18146 | -1.73 | C27H34O15 | MS2[597]:137.0231(100), 273.0765(56), 125.0230(36), 289.0714(31), 151.0389(15), 274.0798(10) |  | Phloretin-di-O-glucoside |

| **Table1** (continued) | | | | | | | | |
| --- | --- | --- | --- | --- | --- | --- | --- | --- |
| Peak | tR | Theoretical Mass *m/z* | Experimental Mass *m/z* | Error (ppm) | Formula | MS/MS fragment  (-) | MS/MS fragment  (+) | Identification |
|  | 5.17 | 609.12497 | 609.12396 | -1.67 | C30H26O14 | MS2[609]:125.0233(100), 233.0452(60), 289.0718(75), 177.0186(40) |  | Prodelphinidin B-type |
|  | 5.23 | 355.10345 | 355.10406 | 1.70 | C16H20O9 | MS2[355]:125.0230(100), 178.0260(88), 134.0360(84), 149.0595(47), 137.0230(23), 161.0233(20), 165.0183(14) |  | Ferulic acid-O-glucoside[isomer](file:///E:/QSH12345678/%25E6%2596%25B0%25E5%25BB%25BA%25E6%2596%2587%25E4%25BB%25B6%25E5%25A4%25B9/Application/8.9.6.0/resultui/html/index.html" \l "/javascript:;) |
|  | 5.27 | 319.04594 | 319.04596 | 0.06 | C15H12O8 | MS2[319]:125.0233(100), 183.0293(72), 149.0235(39), 165.0186(34), 151.0027(21), 169.014(20), 161.0236(14), |  | Dihydromyricetin |
|  | 5.33 | 197.04554 | 197.04497 | -2.93 | C9H10O5 | MS2[197]:182.0214(100), 197.0450(26), 166.9978(17), 153.0184(11) |  | Syringic acid isomer |

| **Table1** (continued) | | | | | | | | |
| --- | --- | --- | --- | --- | --- | --- | --- | --- |
| Peak | tR | Theoretical Mass *m/z* | Experimental Mass *m/z* | Error (ppm) | Formula | MS/MS fragment  (-) | MS/MS fragment  (+) | Identification |
| 1. * | 5.34 | 577.13514 | 577.13562 | 0.82 | C30H26O12 | MS2[577]:289.0719(100), 125.0233(76), 407.0773(65), 245.0818(13) |  | Procyanidin B2 |
|  | 5.38 | 609.12497 | 609.12372 | -2.07 | C30H26O14 | MS2[609]:125.0233(100), 233.0453(27), 289.0720(31) , 177.0186(34) |  | Prodelphinidin B-type |
|  | 5.41 | 355.10345 | 355.10376 | 0.86 | C16H20O9 | MS2[355]:125.0230(100), 161.0232(22), 165.0182(17), 164.0102(12), 175.0389(11) |  | Ferulic acid-O-glucoside[isomer](file:///E:/QSH12345678/%25E6%2596%25B0%25E5%25BB%25BA%25E6%2596%2587%25E4%25BB%25B6%25E5%25A4%25B9/Application/8.9.6.0/resultui/html/index.html" \l "/javascript:;) |
|  | 5.48 | 353.08780 | 353.08786 | 0.16 | C16H18O9 | MS2[353]:191.0554(100), |  | Cis-5-CQA |
|  | 5.52 | 449.10893 | 449.10925 | 0.70 | C21H22O11 | MS2[449]:61.9870(100), 259.0612(59), 287.0563(17), 269.0456(4) |  | Eriodictyol-O-glucoside |

| **Table1** (continued) | | | | | | | | |
| --- | --- | --- | --- | --- | --- | --- | --- | --- |
| Peak | tR | Theoretical Mass *m/z* | Experimental Mass *m/z* | Error (ppm) | Formula | MS/MS fragment  (-) | MS/MS fragment  (+) | Identification |
|  | 5.56 | 577.13514 | 577.13586 | 1.23 | C30H26O12 | MS2[577]:289.0719(100), 125.0233(78), 407.0775(66), 245.0818(13) |  | Procyanidin B-type |
|  | 5.59 | 329.08780 | 329.08813 | 0.99 | C14H18O9 | MS2[329]:167.0337(100), 123.0437(37), 191.0339(10) |  | vanillic acid-O-glucoside |
|  | 5.70 | 441.08271 | 441.08319 | 1.07 | C22H18O10 | MS2[441]:153.0184(100), 125.0233(47), 161.0235(16), 289.0719(6) |  | Catechin gallate |
|  | 5.82 | 329.08780 | 329.08807 | 0.80 | C14H18O9 | MS2[329]:167.0338(100), 123.0437(40), |  | vanillic acid-O-glucoside |
|  | 5.82 | 625.14102 | 625.14227 | 2.00 | C27H30O17 | MS2[625]:463.0868(100), 301.0348(48), 625.1404(41), 151.0024(3) |  | Quercetin-O-Sophoroside |

| **Table1** (continued) | | | | | | | | |
| --- | --- | --- | --- | --- | --- | --- | --- | --- |
| Peak | tR | Theoretical Mass *m/z* | Experimental Mass *m/z* | Error (ppm) | Formula | MS/MS fragment  (-) | MS/MS fragment  (+) | Identification |
|  | 5.84 | 269.04554 | 269.04660 | 3.91 | C15H10O5 | MS2[269]:117.0334(100), 151.0027(44), 176.0108(41), 169.0651(31), 159.0441(21) |  | Apigenin isomer |
|  | 5.86 | 449.10893 | 449.10928 | 0.77 | C21H22O11 | MS2[449]:259.0613(100), 269.0458(74), 287.0564(46), 178.9979(19) |  | Eriodictyol-O-glucoside |
|  | 5.90 | 271.06009 | 271.05997 | -0.48 | C15H11O5 |  | MS2[271]:271.0600(100), 215.0702(90), 149.0234(83), 243.0651(76) | Pelargonidin |
|  | 6.02 | 289.07176 | 289.07202 | 0.90 | C15H14O6 | MS2[289]:289.0721(100), 245.0818(90), 203.0708(50), 205.0502(35), 187.0394(10) |  | Epicatechin |
|  | 6.17 | 163.04006 | 163.03925 | -5.01 | C9H8O3 | MS2[163]:163.0329(100), 119.0490(3) |  | p-Coumaric acid isomer |

| **Table1** (continued) | | | | | | | | |
| --- | --- | --- | --- | --- | --- | --- | --- | --- |
| Peak | tR | Theoretical Mass *m/z* | Experimental Mass *m/z* | Error (ppm) | Formula | MS/MS fragment  (-) | MS/MS fragment  (+) | Identification |
|  | 6.25 | 355.10345 | 355.10385 | 1.11 | C16H20O9 | MS2[355]:193.0496(100), 151.0024(14), 194.0530(11) |  | Ferulic acid-O-glucoside[isomer](file:///E:/QSH12345678/%25E6%2596%25B0%25E5%25BB%25BA%25E6%2596%2587%25E4%25BB%25B6%25E5%25A4%25B9/Application/8.9.6.0/resultui/html/index.html" \l "/javascript:;) |
|  | 6.26 | 179.03498 | 179.03430 | -3.81 | C9H8O4 | MS2[179]:179.0343(100), 109.0283(68) |  | Caffeic acid isomer |
|  | 6.29 | 317.03029 | 317.03061 | 1.01 | C15H10O8 | MS2[317]:109.0284(100), 151.0029(50), 178.9981(14), 137.0234(5) |  | Myricetin isomer |
|  | 6.29 | 561.14023 | 561.14117 | 1.67 | C30H26O11 | MS2[561]:289.0720(100), 125.0233(61), 245.0818(38), 407.0778(22), 271.0614(9), |  | Propelargonidins |
|  | 6.43 | 177.01933 | 177.01863 | -3.97 | C9H6O4 | MS2[177]:89.0382(100), 133.0281(29), 109.0281(14), 105.0332(10) |  | Esculetin |
|  | 6.51 | 167.03498 | 167.03419 | -4.74 | C8H8O4 | MS2[167]:167.0341(100), 152.0106(16), 123.0441(1) |  | vanillic acid isomer |
| **Table1** (continued) | | | | | | | | |
| Peak | tR | Theoretical Mass *m/z* | Experimental Mass *m/z* | Error (ppm) | Formula | MS/MS fragment  (-) | MS/MS fragment  (+) | Identification |
|  | 6.56 | 179.03498 | 179.03432 | -3.70 | C9H8O4 | MS2[179]:179.0342(100), 109.0283(64) |  | Caffeic acid isomer |
| 1. * | 6.82 | 287.05501 | 287.05499 | -0.09 | C15H11O6 |  | MS2[287]:287.0549(100), | Cyanidin |
|  | 6.98 | 355.10345 | 355.10358 | 0.35 | C16H20O9 | MS2[355]:193.0499(100) |  | Ferulic acid-O-glucoside[isomer](file:///E:/QSH12345678/%25E6%2596%25B0%25E5%25BB%25BA%25E6%2596%2587%25E4%25BB%25B6%25E5%25A4%25B9/Application/8.9.6.0/resultui/html/index.html" \l "/javascript:;) |
| 1. * | 7.52 | 163.04006 | 163.03922 | -5.20 | C9H8O3 | MS2[163]:119.0490(100), 163.0028(42), |  | p-Coumaric acid |
|  | 7.74 | 561.14023 | 561.14081 | 1.03 | C30H26O11 | MS2[561]:289.0719(100), 245.0818(31), 125.0233(23), 407.0774(8), 271.0611(7) |  | Propelargonidins |
|  | 7.76 | 849.20362 | 849.20520 | 1.86 | C45H38O17 | MS2[849]:125.0233(100), 289.0721(43), 407.0774(23), 161.0236(21), 271.0614(18), 425.0896(1) |  | Epiafzelechin-epicatechin-epicatechin |
| **Table1** (continued) | | | | | | | | |
| Peak | tR | Theoretical Mass *m/z* | Experimental Mass *m/z* | Error (ppm) | Formula | MS/MS fragment  (-) | MS/MS fragment  (+) | Identification |
| 1. * | 7.80 | 173.08193 | 173.08116 | -4.46 | C8H14O4 | MS2[173]:111.0803(100), 173.0447(69) |  | Suberic acid |
|  | 7.81 | 609.12497 | 609.12622 | 2.04 | C30H26O14 | MS2[609]:289.0717(100), 125.0233(98), 423.0717(20), 177.0184(19), 305.0665(1), |  | Prodelphinidin B-type |
|  | 7.95 | 465.10384 | 465.10422 | 0.80 | C21H22O12 | MS2[465]:285.0406(100), 125.0233(52), 303.0512(27), 151.0027(3) |  | Taxifolin-hexoside |
|  | 8.07 | 865.19853 | 865.19971 | 1.36 | C45H38O18 | MS2[865]:125.0233(100), 289.0720(45), 161.0236(28), 407.0775(27), 245.0456(11) |  | (epi)catechin-(epi)catechin-(epi)catechin |
|  | 9.24 | 441.08271 | 441.08282 | 0.23 | C22H18O10 | MS2[441]:153.0184(100), 125.0233(50), 161.0235(15), 289.0716(3) |  | [Epicatechin gallate](https://www.chemsrc.com/en/cas/1257-08-5_598585.html" \t "https://www.chemsrc.com/cas/_blank) isomer |

| **Table1** (continued) | | | | | | | | |
| --- | --- | --- | --- | --- | --- | --- | --- | --- |
| Peak | tR | Theoretical Mass *m/z* | Experimental Mass *m/z* | Error (ppm) | Formula | MS/MS fragment  (-) | MS/MS fragment  (+) | Identification |
| 1. * | 9.40 | 193.05063 | 193.04977 | -4.47 | C10H10O4 | MS2[193]:178.0266(100), 134.0364(92), 158.8460(75), 193.0502(46), 149.0600(42), 137.0235(16) |  | Ferulic acid |
|  | 9.57 | 435.12967 | 435.12891 | -1.75 | C21H24O10 | MS2[435]:229.0867(100), 273.0770(50), 137.0234(44), 255.0663(24), 123.0440(18) |  | Phlorizin isomer |
|  | 9.58 | 441.08271 | 441.08295 | 0.52 | C22H18O10 | MS2[441]:153.0184(100), 125.0233(64), 161.0236(20), 243.0663(12), 289.0723(7) |  | [Epicatechin gallate](https://www.chemsrc.com/en/cas/1257-08-5_598585.html" \t "https://www.chemsrc.com/cas/_blank) |
|  | 9.66 | 849.20362 | 849.20575 | 2.51 | C45H38O17 | MS2[849]:125.0234(100), 289.0721(44), 407.0776(28), 161.0236(19), 271.0614(8), 425.0887(1) |  | Epiafzelechin-epicatechin-epicatechin |
|  | 9.67 | 463.12348 | 463.12350 | 0.03 | C22H23O11 |  | MS2[463]:301.0706(100) | Peonidin-O-glucoside |

| **Table1** (continued) | | | | | | | | |
| --- | --- | --- | --- | --- | --- | --- | --- | --- |
| Peak | tR | Theoretical Mass *m/z* | Experimental Mass *m/z* | Error (ppm) | Formula | MS/MS fragment  (-) | MS/MS fragment  (+) | Identification |
|  | 9.80 | 463.12348 | 463.12350 | 0.03 | C22H23O11 |  | MS2[463]:301.0706(100), | Peonidin-O-glucoside |
|  | 9.84 | 625.14102 | 625.14264 | 2.59 | C27H30O17 | MS2[625]:463.0877(100), 301.0349(75), 151.0025(1) |  | Quercetin-O-Sophoroside |
|  | 9.96 | 303.05102 | 303.05121 | 0.61 | C15H12O7 | MS2[303]:125.0233(100), 175.0393(20), 153.0184(14), |  | Taxifolin |
|  | 10.12 | 625.14102 | 625.14081 | -0.34 | C27H30O17 | MS2[625]:463.0879(100), 301.0349(92), 289.0714(19) |  | Quercetin-O-Sophoroside |
| 1. * | 10.38 | 447.09328 | 447.09412 | 1.87 | C21H20O11 | MS2[447]:327.0511(100), 357.0618(29), 328.0546(11) |  | Orientin |
|  | 10.47 | 315.05102 | 315.05145 | 1.35 | C16H12O7 | MS2[315]:163.0028(100), 315.0514(97), 271.0215(15), 300.0279(12) |  | Isorhamnetin isomer |

| **Table1** (continued) | | | | | | | | |
| --- | --- | --- | --- | --- | --- | --- | --- | --- |
| Peak | tR | Theoretical Mass *m/z* | Experimental Mass *m/z* | Error (ppm) | Formula | MS/MS fragment  (-) | MS/MS fragment  (+) | Identification |
|  | 10.57 | 849.20362 | 849.20557 | 2.29 | C45H38O17 | MS2[849]:125.0233(100), 289.0721(64), 271.0614(30), 161.0236(18), 407.0776(15), |  | Epiafzelechin-epicatechin-epicatechin |
|  | 10.59 | 477.10384 | 477.10428 | 0.90 | C22H22O12 | MS2[477]:315.0513(100), 300.0281(1) |  | Isorhamnetin-O-glucoside |
|  | 10.60 | 479.11840 | 479.11819 | -0.44 | C22H23O12 |  | MS2[479]:317.0655(100), | Petunidin-O-hexoside |
|  | 10.96 | 287.05611 | 287.05637 | 0.90 | C15H12O6 | MS2[287]:151.0028(100), 135.0441(59), 125.0233(42), 107.0127(6) |  | Eriodictyol isomer |
|  | 11.06 | 625.14102 | 625.14276 | 2.78 | C27H30O17 | MS2[625]:301.0347(100), 300.0271(64), 463.0883(27), |  | Quercetin-O-Sophoroside |
|  | 11.37 | 623.16175 | 623.16241 | 1.05 | C28H32O16 | MS2[623]:314.0435(100), 315.0512(38), 271.0251(11) |  | Isorhamnetin-3-O-rutinoside |

| **Table1** (continued) | | | | | | | | |
| --- | --- | --- | --- | --- | --- | --- | --- | --- |
| Peak | tR | Theoretical Mass *m/z* | Experimental Mass *m/z* | Error (ppm) | Formula | MS/MS fragment  (-) | MS/MS fragment  (+) | Identification |
|  | 11.40 | 625.17631 | 625.17639 | 0.13 | C28H33O16 |  | MS2[625]:317.0655(100) | Petunidin-O-rutinoside |
|  | 11.43 | 611.16066 | 611.16144 | 1.27 | C27H31O16 |  | MS2[611]:303.0498(100) | Delphinidin-O-rutinoside |
|  | 11.47 | 561.14023 | 561.14294 | 4.82 | C30H26O11 | MS2[561]:125.0233(100), 289.0720(88), 271.0615(39), 245.0818(20), 407.0777(19), 137.0233(15), |  | Propelargonidins |
|  | 11.48 | 433.11402 | 433.11404 | 0.05 | C21H22O10 | MS2[433]:271.0608(100), 151.0024(36) |  | Naringenin-O-glucoside |
|  | 11.62 | 477.10384 | 477.10406 | 0.44 | C22H22O12 | MS2[477]:314.0435(100), 315.0511(37), 300.0266(2) |  | Isorhamnetin-O-glucoside |
|  | 11.64 | 479.11840 | 479.11823 | -0.36 | C22H23O12 |  | MS2[479]:317.0654(100), | Petunidin-O-hexoside |
|  | 11.73 | 639.15667 | 639.15778 | 1.73 | C28H32O17 | MS2[639]:639.1558(100), 315.0509(24), 477. 1024(17) |  | Isorhamnetin-di-O-glucoside |
| **Table1** (continued) | | | | | | | | |
| Peak | tR | Theoretical Mass *m/z* | Experimental Mass *m/z* | Error (ppm) | Formula | MS/MS fragment  (-) | MS/MS fragment  (+) | Identification |
| 1. * | 11.74 | 431.09837 | 431.09872 | 0.81 | C21H20O10 | MS2[431]:311.0565(100), 283.0614(12), 341.0669(8), 323.0566(1), 269.0459(1) |  | Vitexin |
|  | 11.82 | 611.16066 | 611.16180 | 1.86 | C27H31O16 |  | MS2[611]:303.0498(100) | Delphinidin-O-rutinoside |
|  | 11.85 | 317.06557 | 317.06519 | -1.23 | C16 H13O7 |  | MS2[317]:317.0654(100), 302.0419(6) | Petunidin isomer |
|  | 11.88 | 479.11840 | 479.11826 | -0.30 | C22H23O12 |  | MS2[479]:317.0654(100), 318.0688(11) | Petunidin-O-hexoside |
|  | 11.98 | 623.16175 | 623.16278 | 1.64 | C28H32O16 | MS2[623]:314.0435(100), 315.0512(78), 271.0250(13) |  | Isorhamnetin-3-O-rutinoside |
|  | 11.99 | 317.03029 | 317.03070 | 1.29 | C15H10O8 | MS2[317]:181.0135(100), 153.0184(83), 151.0026(2), 178.9983(2), 137.0234(1) |  | Myricetin isomer |

| **Table1** (continued) | | | | | | | | |
| --- | --- | --- | --- | --- | --- | --- | --- | --- |
| Peak | tR | Theoretical Mass *m/z* | Experimental Mass *m/z* | Error (ppm) | Formula | MS/MS fragment  (-) | MS/MS fragment  (+) | Identification |
|  | 12.01 | 625.17631 | 625.17615 | -0.26 | C28H33O16 |  | MS2[625]:317.0654(100) | Petunidin-O-rutinoside |
|  | 12.26 | 463.12348 | 463.12354 | 0.11 | C22H23O11 |  | MS2[463]:301.0705(100) | Peonidin-O-glucoside |
|  | 12.32 | 303.04992 | 303.04993 | 0.00 | C15H11O7 |  | MS2[303]:303.0497(100),  257.0443(2), 229.0497(1), 137.0232(1) | Delphinidin isomer |
|  | 12.40 | 865.19853 | 865.19952 | 1.14 | C45H38O18 | MS2[865]:125.0233(100), 289.0721(36), 161.0235(24), 407.0774(16), 245.0455(11) |  | (epi)catechin |
|  | 12.47 | 463.08819 | 463.08878 | 1.25 | C21H20O12 | MS2[463]:301.0356(100), 300.0278(11), 151.0028(9) |  | Isoquercitrin isomer |
|  | 12.49 | 465.10275 | 465.10278 | 0.06 | C21H21O12 |  | MS2[465]:303.0497(100) | Delphinidin-O‐hexoside |
|  | 12.53 | 449.10783 | 449.10800 | 0.36 | C21H21O11 |  | MS2[449]:317.0653(100), 303.0497(13) | Petunidin-O-arabinoside |
| **Table1** (continued) | | | | | | | | |
| Peak | tR | Theoretical Mass *m/z* | Experimental Mass *m/z* | Error (ppm) | Formula | MS/MS fragment  (-) | MS/MS fragment  (+) | Identification |
|  | 12.55 | 447.09328 | 447.09381 | 1.18 | C21H20O11 | MS2[447]:285.0401(100), 284.0321(11) |  | Kaempferol-O-hexoside |
|  | 12.58 | 611.16066 | 611.15985 | -1.33 | C27H31O16 |  | MS2[611]:303.0493(100), | Delphinidin-O-rutinoside |
| 1. * | 12.69 | 463.08819 | 463.08875 | 1.19 | C21H20O12 | MS2[463]:300.0278(100), 301.0355(48), 151.0028(3) |  | Hyperoside |
|  | 12.70 | 465.10275 | 465.10272 | -0.07 | C21H21O12 |  | MS2[465]:303.0497(100) | Delphinidin-O‐hexoside |
| 1. * | 12.74 | 609.14610 | 609.14740 | 2.12 | C27H30O16 | MS2[609]:300.0277(100), 301.0354(60), 151.0027(3) |  | Rutin |
|  | 12.75 | 611.16066 | 611.16156 | 1.47 | C27H31O16 |  | MS2[611]:303.0498(100) | Delphinidin-O-rutinoside |
|  | 12.79 | 449.10783 | 449.10770 | -0.31 | C21H21O11 |  | MS2[449]:317.0656(100), | Petunidin-O-arabinoside |

| **Table1** (continued) | | | | | | | | |
| --- | --- | --- | --- | --- | --- | --- | --- | --- |
| Peak | tR | Theoretical Mass *m/z* | Experimental Mass *m/z* | Error (ppm) | Formula | MS/MS fragment  (-) | MS/MS fragment  (+) | Identification |
| 1. * | 12.80 | 187.09758 | 187.09694 | -3.43 | C9H16O4 | MS2[187]:125.0961(100), 187.0969(69) |  | Azelaic Acid |
|  | 12.85 | 849.20362 | 865.19824 | -0.34 | C45H38O17 | MS2[849]:125.0233(100), 289.0720(65), 271.0613(25), 407.0775(23), 161.0235(21), 425.0896(1) |  | Epiafzelechin-epicatechin-epicatechin |
|  | 12.87 | 479.11840 | 479.11826 | -0.30 | C22H23O12 |  | MS2[479]:317.0654(100), | Petunidin-O-hexoside |
|  | 12.88 | 639.15667 | 639.15710 | 0.67 | C28H32O17 | MS2[639]:315.0507(100), 639.1562(12), |  | Isorhamnetin-di-O-glucoside |
|  | 12.91 | 317.06557 | 317.06543 | -0.47 | C16 H13O7 |  | MS2[317]:317.0655(100), 165.0182(18), 302.0418(6), 229.0496(1) | Petunidin isomer |
| 1. * | 12.98 | 447.09328 | 447.09375 | 1.04 | C21H20O11 | MS2[447]:285.0407(100), 284.0329(12) |  | Luteoloside |

| **Table1** (continued) | | | | | | | | |
| --- | --- | --- | --- | --- | --- | --- | --- | --- |
| Peak | tR | Theoretical Mass *m/z* | Experimental Mass *m/z* | Error (ppm) | Formula | MS/MS fragment  (-) | MS/MS fragment  (+) | Identification |
|  | 12.99 | 449.10783 | 449.10776 | -0.17 | C21H21O11 |  | MS2[449]:287.0548(100) | Cyanidin-O-hexoside |
|  | 13.05 | 639.15667 | 639.15765 | 1.53 | C28H32O17 | MS2[639]:315.0507(100), 289.0714(15), 316.0538(15), 314.0429(11) |  | Isorhamnetin-di-O-glucoside |
|  | 13.06 | 463.12348 | 463.12292 | -1.23 | C22H23O11 |  | MS2[463]:317.0654(100), 301.0705(14) | Petunidin-O-rhamnoside |
|  | 13.06 | 639.19196 | 639.19220 | 0.37 | C29H35O16 | 无463碎片 | MS2[639]:331.0809(100) | Malvidin-O-rutinoside |
|  | 13.08 | 623.16175 | 623.16315 | 2.23 | C28H32O16 | MS2[623]:461.1086(100), 315.0513(85), 477.1039(76), 289.0717(17) |  | Isorhamnetin-3-O-rutinoside |
|  | 13.12 | 433.11402 | 433.11441 | 0.90 | C21H22O10 | MS2[433]:271.0614(100), 151.0027(13) |  | Naringenin-O-glucoside |

| **Table1** (continued) | | | | | | | | |
| --- | --- | --- | --- | --- | --- | --- | --- | --- |
| Peak | tR | Theoretical Mass *m/z* | Experimental Mass *m/z* | Error (ppm) | Formula | MS/MS fragment  (-) | MS/MS fragment  (+) | Identification |
| 1. * | 13.14 | 515.11949 | 515.12140 | 3.69 | C25H24O12 | MS2[515]:173.0448(100), 179.0342(88), 191.0553(38), 161.0234(22), 135.0440(13) |  | 3,4-DiCQA |
|  | 13.17 | 493.13405 | 493.13388 | -0.35 | C23H25O12 |  | MS2[493]:331.0810(100), 332.0844(10) | malvidin-O-hexoside |
|  | 13.23 | 639.19196 | 639.19202 | 0.09 | C29H35O16 |  | MS2[639]:331.0810(100) | Malvidin-O-rutinoside |
|  | 13.29 | 447.09328 | 447.09299 | -0.66 | C21H20O11 | MS2[447]:284.0323(100), 285.0399(67), 255.0293(14), |  | Kaempferol-O-hexoside |
|  | 13.31 | 449.10783 | 449.10803 | 0.43 | C21H21O11 |  | MS2[449]:287.0544(100), | Cyanidin-O-hexoside |
| 1. * | 13.31 | 515.11949 | 515.12134 | 3.57 | C25H24O12 | MS2[515]:191.0555(100), 179.0343(58), 173.0446(5), 135.0441(8) |  | 3,5-DiCQA |

| **Table1** (continued) | | | | | | | | |
| --- | --- | --- | --- | --- | --- | --- | --- | --- |
| Peak | tR | Theoretical Mass *m/z* | Experimental Mass *m/z* | Error (ppm) | Formula | MS/MS fragment  (-) | MS/MS fragment  (+) | Identification |
|  | 13.37 | 493.13405 | 493.13403 | -0.05 | C23H25O12 |  | MS2[493]:331.0810(100), 332.0844(9) | Malvidin-O-hexoside |
|  | 13.51 | 447.09328 | 447.09402 | 1.65 | C21H20O11 | MS2[447]:285.0406(100), 284.0328(34) |  | Kaempferol-O-hexoside |
|  | 13.53 | 449.10783 | 449.10794 | 0.23 | C21H21O11 |  | MS2[449]:287.0548(100) | Cyanidin-O-hexoside |
|  | 13.53 | 623.16175 | 623.16302 | 2.03 | C28H32O16 | MS2[623]:315.0513(100), 314.0435(41), 461.1088(2), 271.0249(1), 151.0029(1) |  | Isorhamnetin-3-O-rutinoside |
|  | 13.55 | 625.17631 | 625.17657 | 0.41 | C28H33O16 |  | MS2[625]:317.0654(100) | Petunidin-O-rutinoside |
|  | 13.56 | 463.08819 | 463.08878 | 1.25 | C21H20O12 | MS2[463]:301.0356(100), 151.0027(9), 300.0280(2) |  | Isoquercitrin isomer |

| **Table1** (continued) | | | | | | | | |
| --- | --- | --- | --- | --- | --- | --- | --- | --- |
| Peak | tR | Theoretical Mass *m/z* | Experimental Mass *m/z* | Error (ppm) | Formula | MS/MS fragment  (-) | MS/MS fragment  (+) | Identification |
| 1. * | 13.59 | 431.09837 | 431.09845 | 0.19 | C21H20O10 | MS2[431]:269.0457(100), 431.0987(40), 311.0564(6), 283.0621(2) |  | Cosmosiin |
| 1. * | 13.61 | 435.12967 | 435.12982 | 0.35 | C21H24O10 | MS2[435]:273.0771(100), 167.0342(72) |  | Phlorizin |
|  | 13.63 | 433.11292 | 433.11316 | 0.55 | C21H21O10 |  | MS2[433]:271.0600(100) | Pelargonidin-O-hexoside |
|  | 13.65 | 465.10275 | 465.10278 | 0.06 | C21H21O12 |  | MS2[465]:303.0498(100) | Delphinidin-O‐hexoside |
|  | 13.66 | 301.07066 | 301.07059 | -0.25 | C16H13O6 |  | MS2[301]:301.0705(100), 286.0471(4) | Peonidin isomer |
|  | 13.66 | 303.04992 | 303.04962 | -1.02 | C15H11O7 |  | MS2[303]:303.0492(100), 153.0179(42), 229.0491(35), 137.0231(31), 257.0439(18) | Delphinidin isomer |
|  | 13.68 | 609.18139 | 609.18140 | 0.01 | C28H33O15 |  | MS2[609]:301.0705(100), 463.1228(1) | Peonidin-O-rutinoside |

| **Table1** (continued) | | | | | | | | |
| --- | --- | --- | --- | --- | --- | --- | --- | --- |
| Peak | tR | Theoretical Mass *m/z* | Experimental Mass *m/z* | Error (ppm) | Formula | MS/MS fragment  (-) | MS/MS fragment  (+) | Identification |
|  | 13.71 | 447.09328 | 447.09378 | 1.11 | C21H20O11 | MS2[447]:285.0406(100), 284.0330(1) |  | Kaempferol-O-hexoside |
| 1. * | 13.72 | 317.03029 | 317.03055 | 0.82 | C15H10O8 | MS2[317]:317.0304(100), 178.9978(80), 151.0027(53), 137.0234(32), 180.9118(16), 112.9845(11) |  | Myricetin |
|  | 13.72 | 449.10783 | 449.10791 | 0.16 | C21H21O11 |  | MS2[449]:287.0548(100) | Cyanidin-O-hexoside |
| 1. * | 13.72 | 515.11949 | 515.12018 | 1.32 | C25H24O12 | MS2[515]:173.0448(100), 179.0343(67), 191.0555(28), 135.0441(9), 161.0236(1) |  | 4,5-DiCQA |
|  | 13.86 | 463.12348 | 463.12332 | -0.36 | C22H23O11 |  | MS2[463]:301.0705(100), | Peonidin-O-glucoside |
|  | 13.90 | 315.05102 | 315.05151 | 1.54 | C16H12O7 | MS2[315]:315.0514(100), 165.0186(30), 271.0249(18), 300.0277(16), 193.0137(14), |  | Isorhamnetin isomer |

| **Table1** (continued) | | | | | | | | |
| --- | --- | --- | --- | --- | --- | --- | --- | --- |
| Peak | tR | Theoretical Mass *m/z* | Experimental Mass *m/z* | Error (ppm) | Formula | MS/MS fragment  (-) | MS/MS fragment  (+) | Identification |
|  | 13.91 | 317.06557 | 317.06561 | 0.10 | C16 H13O7 |  | MS2[317]:317.0654(100), 302.0418(6) | Petunidin isomer |
|  | 13.93 | 447.09328 | 447.09378 | 1.11 | C21H20O11 | MS2[447]:285.0407(100), 284.0323(4) |  | Kaempferol-O-hexoside |
|  | 13.94 | 449.10783 | 449.10782 | -0.04 | C21H21O11 |  | MS2[449]:287.0549100) | Cyanidin-O-hexoside |
| 1. * | 14.14 | 263.12888 | 263.12894 | 0.22 | C15H20O4 | MS2[263]:194.9866(100), 203.1070(71), 128.9945(66), 178.9914(54), |  | Abscisic acid |
| 1. * | 14.14 | 435.12967 | 435.13007 | 0.92 | C21H24O10 | MS2[435]:273.0771(100), 167.0342(44), 297.0771(11), 191.0334(2) |  | Trilobatin |
| 1. * | 14.22 | 287.05611 | 287.05661 | 1.74 | C15H12O6 | MS2[287]:151.0027(100), 135.0441(62) |  | Eriodictyol |

| **Table1** (continued) | | | | | | | | |
| --- | --- | --- | --- | --- | --- | --- | --- | --- |
| Peak | tR | Theoretical Mass *m/z* | Experimental Mass *m/z* | Error (ppm) | Formula | MS/MS fragment  (-) | MS/MS fragment  (+) | Identification |
| 1. * | 14.81 | 301.03537 | 301.03574 | 1.21 | C15H10O7 | MS2[301]:301.0356(100), 151.0027(84), 178.9979(48), 121.0284(14) |  | Quercetin |
|  | 14.82 | 303.04992 | 303.04990 | -0.10 | C15H11O7 |  | MS2[303]:303.0498(100), 257.0444(2), 153.0183(1), 229.0498(1), 137.0234(1) | Delphinidin isomer |
|  | 14.87 | 315.05102 | 315.05109 | 0.20 | C16H12O7 | MS2[315]:300.0277(100), 315.0514(24) |  | Isorhamnetin isomer |
|  | 14.93 | 271.06119 | 271.06177 | 2.12 | C15H12O5 | MS2[271]:253.0506(100), 227.0711(67), |  | Naringenin isomer |
|  | 15.03 | 285.04046 | 285.04080 | 1.19 | C15H10O6 | MS2[285]:285.0406(100), 151.0029(1) |  | Luteolin |
|  | 15.10 | 331.08232 | 331.08112 | -0.11 | C17H15O7 |  | MS2[313]:331.0810(100) | Malvidin isomer |
|  | 15.19 | 331.08232 | 331.08105 | -0.18 | C17H15O7 |  | MS2[313]:331.0810(100) | Malvidin isomer |
| **Table1** (continued) | | | | | | | | |
| Peak | tR | Theoretical Mass *m/z* | Experimental Mass *m/z* | Error (ppm) | Formula | MS/MS fragment  (-) | MS/MS fragment  (+) | Identification |
|  | 15.26 | 461.10893 | 461.10999 | 2.29 | C22H22O11 | MS2[461]:315.0506(100), 314.0429(38), 299.0194(29), 300.0269(17), 287.0557(19) |  | Isorhamnetin-O-rhamnoside |
| 1. * | 15.37 | 271.06119 | 271.06152 | 1.19 | C15H12O5 | MS2[271]:151.0027(100), 119.0491(35), 93.0333(16), 177.0186(13), 107.0127(10), |  | Naringenin |
| 1. * | 15.59 | 273.07684 | 273.07721 | 1.33 | C15H14O5 | MS2[273]:123.0438(100), 119.0489(67), 167.0338(42), 125.0231(26) |  | Phloretin |
| 1. * | 16.15 | 269.04554 | 269.04584 | 1.09 | C15H10O5 | MS2[269]:269.0457(100), 225.0553(2), 151.0026(1), 117.0332(1) |  | apigenin |
| 1. * | 16.23 | 285.04046 | 285.04080 | 1.19 | C15H10O6 | MS2[285]:285.0406(100), 151.0026(2) |  | Kempferol |

| **Table1** (continued) | | | | | | | | |
| --- | --- | --- | --- | --- | --- | --- | --- | --- |
| Peak | tR | Theoretical Mass *m/z* | Experimental Mass *m/z* | Error (ppm) | Formula | MS/MS fragment  (-) | MS/MS fragment  (+) | Identification |
|  | 16.56 | 299.05611 | 299.05618 | 0.23 | C16H12O6 | MS2[299]:284.0323(100), 256.0372(46), 285.0358(15), 271.0244(11), 151.0023(8) |  | Methylkaempferol |
| 1. * | 16.61 | 315.05102 | 315.05154 | 1.63 | C16H12O7 | MS2[315]:300.0278(100), 315.0514(80) |  | Isorhamnetin |
| 1. * | 16.95 | 269.04554 | 269.04590 | 1.31 | C15H10O5 | MS2[269]:269.0457(100), 223.0398(1), 197.0602(1) |  | Baicalein |
| 1. * | 23.07 | 593.13006 | 593.13110 | 1.75 | C30H26O13 | MS2[593]:121.0284(100), 209.0451(49), 153.0183(3), 125.0234(1) |  | Procyanidin |

**Table S1 Information table of 41 standards of peels of** *D. cirrhosa*

| Name | Formula | purity | article number | company |
| --- | --- | --- | --- | --- |
| Sylicylic acid | C7H6O3 | ＞ 98% | H31A10B96399 | Shanghai yuanye Bio-Technology Co., Ltd |
| 2,2-Dimethylsuccinic acid | C6H10O4 | ＞ 98% | M018598 | MICXY ReaGeNT |
| p-Coumaric acid | C9H8O3 | ＞ 98% | LotK1805057 | aladdin |
| Gallic acid | C7H6O5 | ＞ 98% | PCS0637 | Chengdu Biochem Pure Biotechnology Co., LTD |
| Suberic acid | C8H14O4 | ＞ 98% | 20190620 | Shandong West Asia Chemical Co. LTD |
| Caffeic acid | C9H8O4 | ＞ 98% | C108306 | aladdin |
| Methyl gallate | C8H8O5 | ＞ 98% | PCS0634 | Chengdu Biochem Pure Biotechnology Co., LTD |
| Azelaic acid | C9H16O4 | ＞ 98% | CM1980000 | Shandong West Asia Chemical Co. LTD |
| Citric acid | C6H8O7 | ＞ 98% | C108869 | Tianjin Zhiyuan Chemical Reagent Co. LTD |
| Quinic acid | C7H12O6 | ＞ 98% | A06N11L130218 | Shanghai yuanye Bio-Technology Co., Ltd |
| Ferulic acid | C10H10O4 | ＞ 98% | UD3365500 | Shandong West Asia Chemical Co. LTD |
| Abscisic acid | C15H20O4 | ＞ 98% | 20190529 | Shandong West Asia Chemical Co. LTD |
| apigenin | C15H10O5 | ＞ 98% | PCS0751 | Chengdu Biochem Pure Biotechnology Co., LTD |

| Name | Formula | purity | article number | company |
| --- | --- | --- | --- | --- |
| Baicalein | C15H10O5 | ＞ 98% | H-018-190815 | Chengdu Herbpurify Co., Ltd. |
| Naringenin | C15H12O5 | ＞ 98% | Y-030-190812 | Chengdu Herbpurify Co., Ltd. |
| Phloretin | C15H14O5 | ＞ 98% | 200-488-7 | Spring Autumn |
| Kempferol | C15H10O6 | ＞ 98% | S-014-171216 | Chengdu Herbpurify Co., Ltd. |
| cyanidenon | C15H10O6 | ＞ 98% | M-007-190422 | Chengdu Herbpurify Co., Ltd. |
| anthocyanidin | C15H11O6 | ＞ 98% | wkq19010408 | Weikeqi Biological Technology  Co., Ltd. |
| Eriodictyol | C15H12O6 | ＞ 98% | PS1160-0025 | Chengdu Push Bio-Technology Co., Ltd. |
| catechin | C15H14O6 | ＞ 98% | B21722 | Shanghai yuanye Bio-Technology Co., Ltd |
| Quercetin | C15H10O7 | ＞ 98% | AF8041802 | Chengdu Alfa Biotechnology Co., Ltd. |
| Taxifolin | C15H12O7 | ＞ 98% | PCS0371 | Chengdu Biochem Pure Biotechnology Co., Ltd. |
| Isorhamnetin | C16H12O7 | ＞ 98% | Y-039-181103 | Chengdu Herbpurify Co., Ltd. |
| myricetin | C15H10O8 | ＞ 98% | M111175 | aladdin |
| Neochlorogenic acid | C16H18O9 | ＞ 98% | X-014-170309 | Chengdu Herbpurify Co., Ltd. |
| Chlorogenic acid | C16H18O9 | ＞ 98% | L-007-171216 | Chengdu Herbpurify Co., Ltd. |

| Name | Formula | purity | article number | company |
| --- | --- | --- | --- | --- |
| Vitexin | C21H20O10 | ＞ 98% | M-023-181025 | Chengdu Herbpurify Co., Ltd. |
| Daphnetin glycoside | C21H20O10 | ＞ 98% | HA204891 | Herbest |
| Phlorizin | C21H24O10 | ＞ 98% | wkq18050407 | Weikeqi Biological Technology  Co., Ltd. |
| Phlorizin | C21H24O10 | ＞ 98% | T414325 | aladdin |
| Orientin | C21H20O11 | ＞ 98% | H-044-181025 | Chengdu Herbpurify Co., Ltd. |
| Cynaroside | C21H20O11 | ＞ 98% | HL090354 | Herbest |
| Hyperoside | C21H20O12 | ＞ 98% | 111521-201507 | China Institute for Food and Drug Control |
| 3,4-DiCQA | C25H24O12 | ＞ 98% | Y-069-180105 | Chengdu Herbpurify Co., Ltd. |
| 3,5-DiCQA | C25H24O12 | ＞ 98% | Y-068-170903 | Chengdu Herbpurify Co., Ltd. |
| 4,5-DiCQA | C25H24O12 | ＞ 98% | Y-070-170515 | Chengdu Herbpurify Co., Ltd. |
| Procyanidin B1 | C30H26O12 | ＞ 98% | wkq19062802 | Weikeqi Biological Technology  Co., Ltd. |
| Procyanidin B2 | C30H26O12 | ＞ 98% | wkq19042903 | Weikeqi Biological Technology  Co., Ltd. |
| Procyanidin | C30H26O13 | ＞ 98% | wkq19050610 | Weikeqi Biological Technology  Co., Ltd. |
| Rutin | C27H30O16 | ＞ 98% | AF8032520 | Chengdu Alfa Biotechnology Co., Ltd. |
